# Supplementary material
Source: publisher figshare collection journal article supplement (https://tandf.figshare.com/ndownloader/files/17512988)

**Supplementary material**


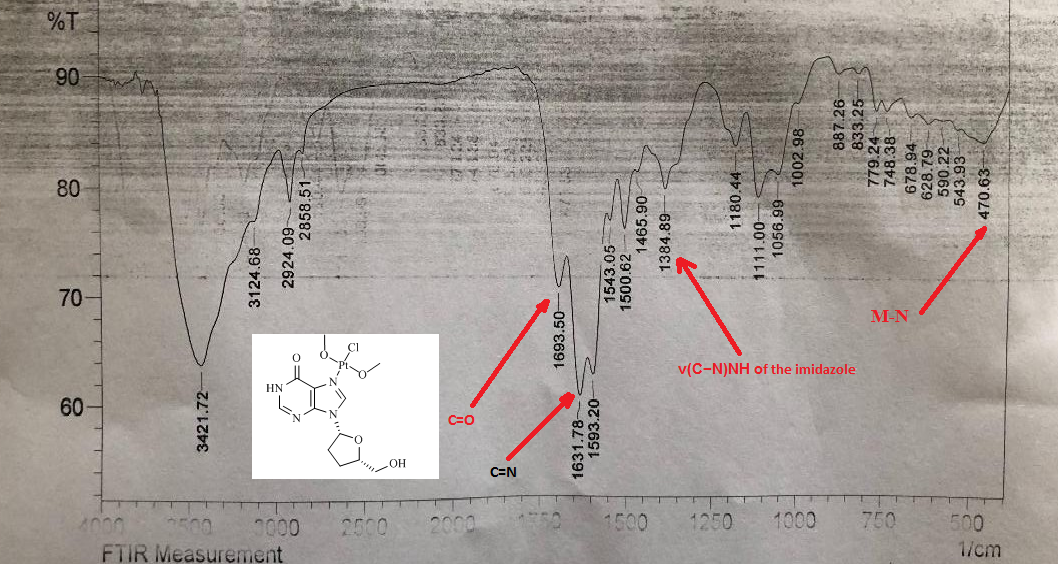


**Figure S1.** FT-IR spectrum of the K[PtCl(CH3O)2(ddI)] complex

Supplement: Supplementary file 1 [file 17512988]
